# Supplementary material
Source: HighWire-hosted journal article supplement (https://bmjopen.bmj.com/content/7/9/e016189)
Supplement: inline-supplementary-material-2 [file inline-supplementary-material-2.pdf]

| a. Reggio Emilia Province     | Birth cohort 1996 |                      |       | Birth cohort 1997 |                      |       |
|-------------------------------|-------------------|----------------------|-------|-------------------|----------------------|-------|
|                               | All               | Vaccinated (3 doses) |       | All               | Vaccinated (3 doses) |       |
|                               | N°                | N°                   | %     | N°                | N°                   | %     |
| <b>All</b>                    | 2260              | 992                  | 43.9% | 2307              | 1729                 | 74.9% |
| <b>Residence</b>              |                   |                      |       |                   |                      |       |
| Correggio                     | 222               | 72                   | 32.4% | 253               | 181                  | 71.5% |
| Montecchio                    | 269               | 128                  | 47.6% | 274               | 221                  | 80.7% |
| Reggio Emilia                 | 999               | 500                  | 50.1% | 989               | 780                  | 78.9% |
| Scandiano                     | 352               | 90                   | 25.6% | 356               | 192                  | 53.9% |
| Castelnuovo Monti             | 127               | 68                   | 53.5% | 119               | 101                  | 84.9% |
| Guastalla                     | 291               | 134                  | 46.1% | 316               | 254                  | 80.4% |
| <b>Citizenship</b>            |                   |                      |       |                   |                      |       |
| Italian                       | 1953              | 935                  | 47.9% | 1975              | 1495                 | 75.7% |
| Foreign                       | 307               | 57                   | 18.6% | 332               | 234                  | 70.5% |
| b. Reggio Emilia Municipality | Birth cohort 1996 |                      |       | Birth cohort 1997 |                      |       |
|                               | All               | Vaccinated (3 doses) |       | All               | Vaccinated (3 doses) |       |
|                               | N°                | N°                   | %     | N°                | N°                   | %     |
| <b>All</b>                    | 792               | 369                  | 46.6% | 803               | 628                  | 78.2% |
| Mother identified             | 715               | 340                  | 47.6% | 730               | 573                  | 78.5% |
| Mother not identified         | 77                | 29                   | 37.7% | 73                | 55                   | 75.3% |
| <b>Mother's age at birth</b>  |                   |                      |       |                   |                      |       |
| <20                           | 18                | 6                    | 33.3% | 22                | 17                   | 77.3% |
| 20-34                         | 605               | 292                  | 48.3% | 584               | 460                  | 78.8% |
| >34                           | 92                | 42                   | 45.7% | 124               | 96                   | 77.4% |
| <b>Years of education</b>     |                   |                      |       |                   |                      |       |
| >12, graduate                 | 65                | 22                   | 33.8% | 78                | 65                   | 83.3% |
| >12, non-graduate             | 261               | 141                  | 54.0% | 280               | 219                  | 78.2% |
| 8-11                          | 321               | 157                  | 48.9% | 318               | 257                  | 80.8% |
| ≤7                            | 65                | 20                   | 30.8% | 52                | 31                   | 59.6% |
| Missing                       | 3                 | 0                    | 0.0%  | 2                 | 1                    | 50.0% |
| <b>Citizenship</b>            |                   |                      |       |                   |                      |       |
| Italian                       | 609               | 315                  | 51.7% | 608               | 480                  | 78.9% |
| Foreign                       | 106               | 25                   | 23.6% | 122               | 93                   | 76.2% |
| <b>Single parent</b>          |                   |                      |       |                   |                      |       |
| Yes                           | 87                | 41                   | 47.1% | 88                | 68                   | 77.3% |
| No                            | 628               | 299                  | 47.6% | 642               | 505                  | 78.7% |
| <b>Sibling</b>                |                   |                      |       |                   |                      |       |
| No                            | 161               | 83                   | 51.6% | 162               | 127                  | 78.4% |
| Yes                           | 554               | 257                  | 46.4% | 568               | 446                  | 78.5% |
| <b>Screening history</b>      |                   |                      |       |                   |                      |       |
| Non-participant               | 89                | 29                   | 32.6% | 90                | 59                   | 65.6% |
| Irregular participant         | 335               | 151                  | 45.1% | 341               | 271                  | 79.5% |
| Regular participant           | 285               | 158                  | 55.4% | 295               | 240                  | 81.4% |
| Missing                       | 6                 | 2                    | 33.3% | 4                 | 3                    | 75.0% |

**Supplementary material 2, table 1:** Distribution of girls vaccinated with 3 doses of HPV vaccine for girls, services and mothers' variables included in the study, in the two birth cohorts (not invited, 1996; actively invited, 1997). In part a., all girls resident in Reggio Emilia were included while in part b. only girls resident in the Municipality of Reggio Emilia were included.

| a. Reggio Emilia Province                                    | Birth cohort 1996 (N=2260) |             | Birth cohort 1997 (N=2307) |             |
|--------------------------------------------------------------|----------------------------|-------------|----------------------------|-------------|
|                                                              | Vaccinated (3 doses)       |             | Vaccinated (3 doses)       |             |
|                                                              | RR                         | 95% CI      | RR                         | 95% CI      |
| <b>Residence</b> (test for interaction p=0.3058)             |                            |             |                            |             |
| Correggio                                                    | 1                          | -           | 1                          | -           |
| Montecchio                                                   | 1.38                       | (1.11-1.73) | 1.14                       | (1.03-1.25) |
| Reggio Emilia                                                | 1.51                       | (1.24-1.83) | 1.11                       | (1.02-1.20) |
| Scandiano                                                    | 0.75                       | (0.58-0.97) | 0.75                       | (0.66-0.85) |
| Castelnuovo Monti                                            | 1.59                       | (1.25-2.03) | 1.22                       | (1.10-1.36) |
| Guastalla                                                    | 1.40                       | (1.12-1.75) | 1.13                       | (1.03-1.25) |
| <b>Citizenship</b> (test for interaction p<0.00005)          |                            |             |                            |             |
| Italian                                                      | 1                          | -           | 1                          | -           |
| Foreign                                                      | 0.38                       | (0.30-0.49) | 0.89                       | (0.83-0.95) |
| b. Reggio Emilia Municipality                                | Birth cohort 1996 (N=706)  |             | Birth cohort 1997 (N=724)  |             |
|                                                              | Vaccinated (3 doses)       |             | Vaccinated (3 doses)       |             |
|                                                              | RR                         | 95% CI      | RR                         | 95% CI      |
| <b>Mother's age at birth</b> (test for interaction p=0.7970) |                            |             |                            |             |
| <20                                                          | 1                          | -           | 1                          | -           |
| 20-34                                                        | 1.18                       | (0.63-2.21) | 1.00                       | (0.77-1.29) |
| >34                                                          | 1.18                       | (0.61-2.27) | 0.99                       | (0.75-1.30) |
| <b>Years of education</b> (test for interaction p=0.0788)    |                            |             |                            |             |
| >12, graduate                                                | 1                          | -           | 1                          | -           |
| >12, non-graduate                                            | 1.55                       | (1.09-2.22) | 0.94                       | (0.84-1.05) |
| 8-11                                                         | 1.63                       | (1.14-2.33) | 0.98                       | (0.87-1.10) |
| ≤7                                                           | 1.04                       | (0.64-1.70) | 0.75                       | (0.59-0.96) |
| <b>Single parent</b> (test for interaction p=0.9626)         |                            |             |                            |             |
| No                                                           | 1                          | -           | 1                          | -           |
| Yes                                                          | 1.04                       | (0.83-1.30) | 1.02                       | (0.90-1.15) |
| <b>Sibling</b> (test for interaction p=0.5518)               |                            |             |                            |             |
| No                                                           | 1                          | -           | 1                          | -           |
| Yes                                                          | 0.97                       | (0.81-1.15) | 1.02                       | (0.93-1.12) |
| <b>Screening history</b> (test for interaction p=0.4309)     |                            |             |                            |             |
| Non-participant                                              | 1                          | -           | 1                          | -           |
| Irregular participant                                        | 1.39                       | (1.01-1.90) | 1.20                       | (1.02-1.41) |
| Regular participant                                          | 1.68                       | (1.23-2.30) | 1.22                       | (1.04-1.44) |

**Supplementary material 2, table 2:** Relative risk of being vaccinated with 3 doses for girls in the two birth cohorts (not invited, 1996; actively invited, 1997). Multivariate log-binomial regression models stratified by birth cohort and adjusted by citizenship, educational level, demographics (mother's age at birth, number of pregnancies, marital status) and adherence to screening were performed. In part a., all girls resident in Reggio Emilia were included while in part b. only girls resident in the Municipality of Reggio Emilia were included.

| Mothers overdue for Pap test on January, 1 2008                      | Pap test Participation |      |             |
|----------------------------------------------------------------------|------------------------|------|-------------|
|                                                                      | (%)                    | RR   | 95% CI      |
| <b>Mother's age at birth</b>                                         |                        |      |             |
| <20 (n=4 )                                                           | 50.0                   | 1    | -           |
| 20-34 (n=736 )                                                       | 70.7                   | 1.26 | (0.47-3.36) |
| >34 (n=213 )                                                         | 64.8                   | 0.75 | (0.42-3.02) |
| <b>Years of education</b>                                            |                        |      |             |
| >12, graduate (n=101 )                                               | 81.2                   | 1    | -           |
| >12, non-graduate (n=345 )                                           | 75.4                   | 0.91 | (0.81-1.02) |
| ≤12 (n=505 )                                                         | 62.6                   | 0.76 | (0.67-0.85) |
| <b>Citizenship</b>                                                   |                        |      |             |
| Italian (n= 815)                                                     | 69.7                   | 1    | -           |
| Foreign (n=138)                                                      | 66.7                   | 0.99 | (0.87-1.13) |
| <b>Cohort</b>                                                        |                        |      |             |
| 1996 (N=472)                                                         | 68.0                   | 1    | -           |
| 1997 (N=481)                                                         | 70.5                   | 1.04 | (0.96-1.13) |
| <b>Daughter's vaccination status (3 doses)</b>                       |                        |      |             |
| Mothers who did not vaccinate (N=341)                                | 61.3%                  | 1    | -           |
| Mothers who vaccinated (N=612)                                       | 73.7%                  | 1.19 | (1.09-1.31) |
| <b>Stratified analyses</b>                                           |                        |      |             |
| <b>by Mother's educational level (test for interaction p=0.0402)</b> |                        |      |             |
| <b>Low (N=505)</b>                                                   |                        |      |             |
| <b>1996</b>                                                          | 62.1                   | 1    | -           |
| <b>1997</b>                                                          | 63.1                   | 1.01 | (0.88-1.16) |
| <b>Medium (N=345)</b>                                                |                        |      |             |
| <b>1996</b>                                                          | 75.9                   | 1    | -           |
| <b>1997</b>                                                          | 74.3                   | 0.98 | (0.86-1.11) |
| <b>High (N=95)</b>                                                   |                        |      |             |
| <b>1996</b>                                                          | 69.8                   | 1    | -           |
| <b>1997</b>                                                          | 89.7                   | 1.27 | (1.04-1.56) |

**Supplementary material 2, table 3:** Relative risk of receiving a Pap test after the vaccination campaign in mothers overdue for Pap test on January 1, 2008. Two log-binomial regression models adjusted by mother's age at birth, education level and citizenship was performed: the first to test the effect of active vaccination campaign (1997 cohort) vs. no invitation (1996 cohort) and the second to test the association between daughter's vaccination with 3 doses. Secondly, the RR of receiving a Pap test after the vaccination campaign among mother's education strata was assessed performing a stratified log-binomial regression model adjusted by mother's age at birth and citizenship. Only women resident in the Reggio Emilia municipality were included. [*Low* ≤11 years of education; *Medium* >12, non-graduate; *High* > 12, graduate]
