# Supplementary material
Source: HighWire-hosted journal article supplement (https://bmjopen.bmj.com/content/7/9/e016189)

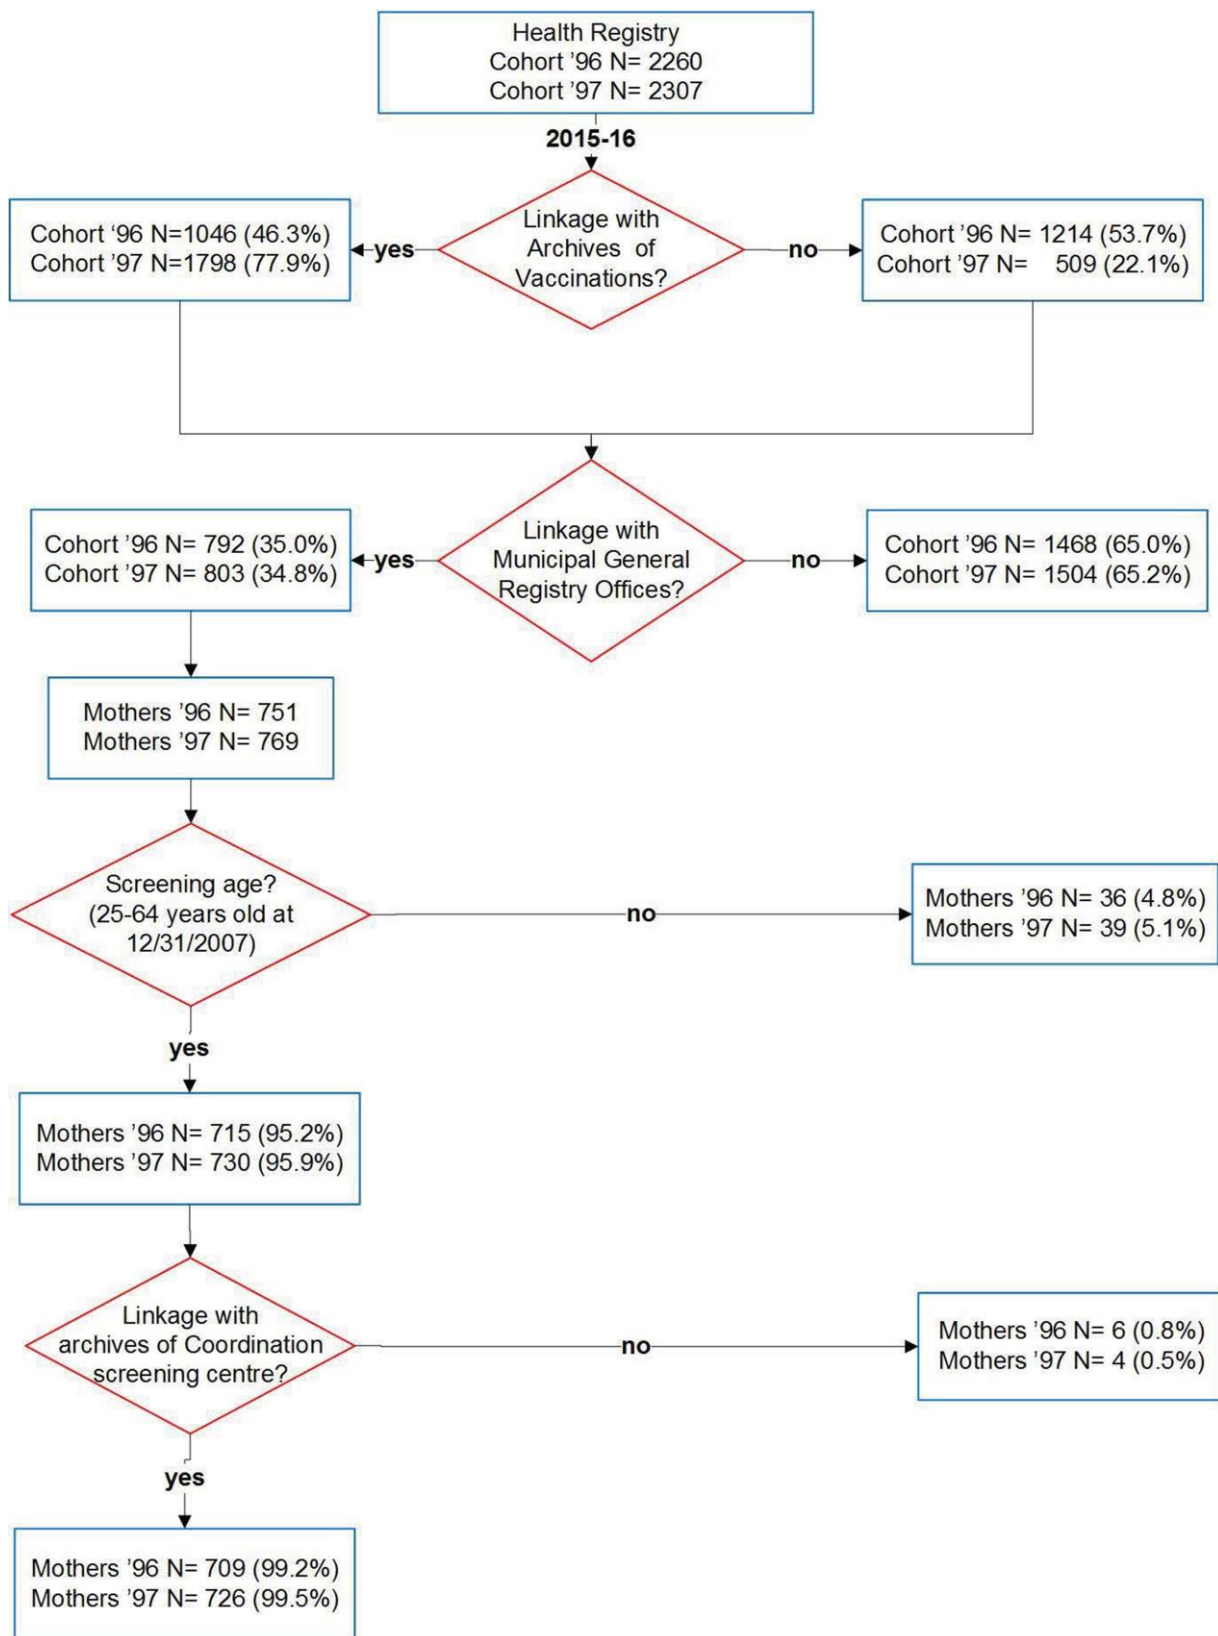

Supplementary material 1 – Study flow-chart.

Supplement: inline-supplementary-material-1 [file inline-supplementary-material-1.pdf]
